1 **Abbreviated title:** Optogenetic BLA inhibition and risky decision making

2

3

4

5

6 **Optogenetic inhibition reveals distinct roles for basolateral amygdala activity at**  
7 **discrete timepoints during risky decision making**

8

9 Caitlin A. Orsini<sup>1</sup>, Caesar M. Hernandez<sup>2</sup>, Sarthak Singhal<sup>3</sup>, Kyle B. Kelly<sup>3</sup>, Charles J. Frazier<sup>3</sup>,

10 Jennifer L. Bizon<sup>1,2,4</sup>, Barry Setlow<sup>1,2,4,5\*</sup>

11

12 <sup>1</sup>Department of Psychiatry; <sup>2</sup>Department of Neuroscience, <sup>3</sup>Department of Pharmacodynamics,

13 <sup>4</sup>Center for Addiction Research Education, <sup>5</sup>Department of Psychology, University of Florida,

14 Gainesville, FL, 32610

15

16 \*Corresponding author. Correspondence should be addressed to Dr. Caitlin Orsini or Dr. Barry  
17 Setlow, Department of Psychiatry, University of Florida College of Medicine, P.O. Box 100256,  
18 Gainesville, FL 32610-0256; email: [orsini@ufl.edu](mailto:orsini@ufl.edu); [setlow@ufl.edu](mailto:setlow@ufl.edu); Tel: 352-294-5203.

19

20 Number of figures: 7

21 Number of tables: 1

22 Number of pages: 35

23 Number of words for abstract: 237

24 Number of words for Significance Statement: 119

25 Number of words for Introduction: 661

26 Number of words for Discussion: 1,547

27

28 **Acknowledgements:** We thank Mr. Matthew Bruner and Mrs. Shannon Wall for their technical  
29 assistance. We also wish to acknowledge the McKnight Brain Research Foundation for their  
30 support of this project. The work was further supported by a Thomas H. Maren Fellowship and  
31 K99DA041493 (CAO), a McKnight Predoctoral Fellowship and the Pat Tillman Foundation (CMH),  
32 and R01DA036534 (BS).

33

34 **Conflicts of interest:** The authors declare no competing financial interests.

## Optogenetic BLA inhibition and risky decision making

### 35 **Abstract**

36           Decision making is a multifaceted process, consisting of several distinct phases that likely  
37 require different cognitive operations. Previous work showed that the basolateral amygdala (BLA)  
38 is a critical substrate for decision making involving risk of punishment; however, it is unclear how  
39 the BLA is recruited at different stages of the decision process. To this end, the current study  
40 used optogenetics to inhibit the BLA during specific task phases in a model of risky decision  
41 making (Risky Decision-making Task; RDT) in which rats choose between a small, “safe” reward  
42 and a large reward accompanied by varying probabilities of footshock punishment. Rats received  
43 intra-BLA microinjections of viral vectors carrying either halorhodopsin (eNpHR3.0-mCherry) or  
44 mCherry alone (control) followed by optic fiber implants and were trained in the RDT. Laser  
45 stimulation during the task occurred during either intertrial interval, deliberation, or reward  
46 outcome phases, the latter of which was further divided into the three possible outcomes (small,  
47 safe; large, unpunished; large, punished). Inhibition of the BLA selectively during the deliberation  
48 phase decreased choice of the large, risky outcome (decreased risky choice). In contrast, BLA  
49 inhibition selectively during delivery of the large, punished outcome increased risky choice.  
50 Inhibition had no effect during the other phases, nor did it affect performance in control rats.  
51 Collectively, these data indicate that the BLA can either inhibit or promote choice of risky options,  
52 depending on the phase of the decision process in which it is active.

53

54

55

56

57

58

59

60

## Optogenetic BLA inhibition and risky decision making

### 61 **Significance Statement**

62           To date, most behavioral neuroscience research on neural mechanisms of decision  
63 making has employed techniques that preclude assessment of distinct phases of the decision  
64 process. Here we show that optogenetic inhibition of the basolateral amygdala (BLA) has opposite  
65 effects on choice behavior in a rat model of risky decision making depending on the phase in  
66 which inhibition occurs. BLA inhibition during a period of deliberation between small, safe and  
67 large, risky outcomes decreased risky choice. In contrast, BLA inhibition during receipt of the  
68 large, punished outcome increased risky choice. These findings highlight the importance of  
69 temporally targeted approaches to understand neural substrates underlying complex cognitive  
70 processes. More importantly, they reveal novel information about dynamic BLA modulation of  
71 risky choice.

72

73

74

75

76

77

78

79

80

81

82

83

84

85

86

## Optogenetic BLA inhibition and risky decision making

### 87 **Introduction**

88           The ability to make adaptive choices requires multiple cognitive operations that work in  
89 concert to guide efficient and optimal behavior (Rangel et al., 2008). For example, an organism  
90 must calculate the objective and subjective value of the available options, which entails evaluating  
91 the relative value of both the benefits and costs associated with each option. This information  
92 must be acquired from past experience, such as the contingencies of previous actions and their  
93 outcomes, as well as other motivational (e.g., hunger) and environmental (e.g. presence of salient  
94 predictive cues) factors. Finally, the organism must determine the value of the actual outcome of  
95 its choice, and use this information as feedback to guide future choices. Together, these  
96 processes allow an organism to execute or inhibit its choice behavior as appropriate to its past,  
97 current, and anticipated future conditions. While the majority of individuals are able to effectively  
98 engage these processes and make adaptive decisions, individuals with psychiatric diseases such  
99 as substance use disorder, anorexia nervosa, and post-traumatic stress disorder exhibit impaired  
100 decision making (Bechara and Damasio, 2002; Crowley et al., 2010; Najavits et al., 2011;  
101 Schneider et al., 2012; Kaye et al., 2013; Gonzalez et al., 2015; Dekkers et al., 2016), often  
102 resulting in maladaptive choices. The specific components of the decision making process that  
103 are perturbed in these pathological conditions, however, are unclear.

104           Decision making is mediated by interconnected brain structures within the  
105 mesocorticolimbic circuit (Orsini et al., 2015b). One such structure within this circuit that has  
106 received considerable attention in cost/benefit decision making is the basolateral amygdala (BLA)  
107 (Winstanley and Floresco, 2016). Using well-validated rodent models of risk-based decision  
108 making, previous work has shown that lesions or pharmacological inactivation of the BLA result  
109 in disadvantageous choices (Winstanley et al., 2004; Ghods-Sharifi et al., 2009; Zeeb and  
110 Winstanley, 2011; Hosking et al., 2014; Tremblay et al., 2014). This is consistent with  
111 neuroimaging data showing that the amygdala is activated during assessment of risky choices  
112 (De Martino et al., 2006; Roiser et al., 2009) and is hypoactive in individuals with impaired risky

## Optogenetic BLA inhibition and risky decision making

113 decision making (Crowley et al., 2010; Gowin et al., 2013). More recently, the BLA has been  
114 implicated in decision making involving risk of explicit punishment (Orsini et al., 2015a). In well-  
115 trained rats, BLA lesions increased choice of a large reward associated with risk of footshock  
116 punishment. These data suggested that the BLA is critical for the integration of reward- and  
117 punishment-related information to guide optimal behavior. Importantly, however, it is unclear how  
118 and at what point in the decision-making process this integration occurs.

119 *In vivo* electrophysiological studies show that BLA neurons do not respond uniformly to  
120 salient stimuli but instead mediate different aspects of motivated behavior. For example, different  
121 populations of BLA neurons respond differentially to rewarding and aversive outcomes  
122 (Schoenbaum et al., 1998, 1999; Paton et al., 2006; Belova et al., 2007; Belova et al., 2008;  
123 Shabel and Janak, 2009; Sangha et al., 2013; Gore et al., 2015), and are organized into  
124 intrinsically (Zhang et al., 2013) and extrinsically distinct circuits (Namburi et al., 2015; Beyeler et  
125 al., 2016). In addition, amygdala neurons differentially contribute to generation of prospective  
126 plans to obtain immediate rewards (Grabenhorst et al., 2012) as well as rewards in the distant  
127 future (Hernadi et al., 2015). This functional heterogeneity within the BLA supports the hypothesis  
128 that the BLA is differentially engaged during decision making involving rewarding and aversive  
129 outcomes. How the BLA is recruited, however, may depend on the specific cognitive components  
130 of the decision-making process. In other words, how the BLA contributes to the deliberative  
131 process of decision making may be distinct from how it contributes to processing the outcomes  
132 of past choices.

133 The advent of optogenetics affords the ability to test this hypothesis by examining BLA  
134 involvement in decision making during distinct components of the decision process. Hence, the  
135 experiments herein examined the effects of BLA inhibition during the deliberation and outcome  
136 phases of a risky decision making task involving risk of explicit punishment.

137

138 **Materials and Methods:**

## Optogenetic BLA inhibition and risky decision making

### 139 **Subjects**

140 Male Long-Evans rats (weighing 250-275 g upon arrival; Charles River Laboratories,  
141 Raleigh, NC) were individually housed and kept on a 12 h light/dark cycle with free access to food  
142 and water except as indicated below. Upon arrival, rats were handled daily for one week prior to  
143 undergoing surgery. During behavioral testing, rats were maintained at 90% of their free-feeding  
144 weight, with their target weights adjusted upward by 5 g/week to account for growth. Animal  
145 procedures were conducted in accordance with the University of Florida Institutional Animal Care  
146 and Use Committee and followed guidelines of the National Institutes of Health.

### 147 **Apparatus**

148 Behavioral testing was conducted in three computer-controlled operant test chambers  
149 (Coulbourn Instruments), each of which was contained in a sound-attenuating cabinet. Chambers  
150 were equipped with a centrally located food trough (TAMIC Instruments) that projected 3 cm into  
151 the chamber and contained a photobeam to detect trough entries. The trough was connected to  
152 a feeder, from which 45 mg food pellets (Test Diet, AIN-76A, 5TUL) were delivered into the trough.  
153 A nosepoke hole was located above the food trough and two retractable levers were positioned  
154 to the left and right of the trough, 11 cm above the floor of the chamber. A 1.12 W lamp was  
155 positioned on the back wall of the sound-attenuating cabinet, and served as a houselight. The  
156 floor of the test chamber was comprised of stainless steel rods connected to a shock generator  
157 that delivered scrambled footshocks. Each operant test chamber was interfaced with a computer  
158 running Graphic State 4.0 software (Coulbourn Instruments), which controlled chamber hardware  
159 (e.g., lever insertion, nosepoke illumination, food pellet delivery) and recorded task events.

### 160 **Laser stimulation**

161 During behavioral test sessions, laser light (560 nm, 8-10 mW output, Shanghai Laser &  
162 Optics Century Co., Ltd.) was delivered bilaterally into the BLA in rats expressing halorhodopsin

## Optogenetic BLA inhibition and risky decision making

163 (eNpHR3.0 group) or mCherry (control group) in the BLA. To reach the brain, light was passed  
164 from the laser through a patch cord (200  $\mu\text{m}$  core, Thor Labs), a rotary joint (1 X 2, 200  $\mu\text{m}$  core,  
165 Doric Lenses) located above the operant chamber, 2 additional patch cords (200  $\mu\text{m}$  core, 0.22  
166 NA, Thor Labs) and bilateral optic fibers (200  $\mu\text{m}$  core, 0.22 NA, 8.3 mm in length; Precision Fiber  
167 Products) implanted in the BLA. The laser was interfaced with the computer running Graphic State  
168 4.0 software to allow for precise timing of light delivery during different task phases.

### 169 ***Surgical procedures***

170 Rats were anesthetized with isoflurane gas (1-5% in  $\text{O}_2$ ) and received subcutaneous  
171 injections of meloxicam (2 mg/kg), buprenorphine (0.05 mg/kg), and sterile saline (10 mL). Rats  
172 were placed into a stereotaxic apparatus (David Kopf) and the scalp was cleaned with a  
173 chlorhexidine/isopropyl alcohol swab. A sterile adhesive surgical drape was subsequently  
174 placed over the body.

175 For rats used in *in vitro* electrophysiology experiments, the scalp was incised and retracted  
176 and the skull was leveled to ensure that bregma and lambda were in the same horizontal plane.  
177 Two burr holes were drilled for bilateral virus injections into the BLA (AP: -3.2, ML:  $\pm$ 4.9, DV: -8.5,  
178 -8.1 mm from skull surface). At each site, an injection needle was lowered to the target depth and  
179 AAV5-CAMKII $\alpha$ -eHpNR3.0-mCherry (University of North Carolina Vector Core) was infused into  
180 the BLA (0.4  $\mu\text{l}$  at the ventral DV coordinate and 0.2  $\mu\text{l}$  at the dorsal DV coordinate, at a rate of  
181 0.5  $\mu\text{l}/\text{min}$ ). The injection needle was attached to polyethylene tubing, which was connected to a  
182 10  $\mu\text{l}$  Hamilton syringe mounted on a syringe pump (Harvard Apparatus). After each injection, the  
183 needle was left in place for an additional 5 minutes to allow for diffusion of the virus. The incision  
184 was then sutured and rats were given an additional 10 mL of saline before being placed on a  
185 heating pad to recover from surgery.

## Optogenetic BLA inhibition and risky decision making

186 For rats used in behavioral experiments, the scalp was incised and retracted and six small  
187 burr holes were drilled into the skull for placement of jeweler's screws. Two screws were placed  
188 anterior to bregma, two between bregma and lambda and two posterior to lambda. This  
189 configuration was used to ensure that the headcap was secured evenly across the skull surface.  
190 After leveling the skull to ensure that bregma and lambda were in the same horizontal plane, two  
191 additional burr holes were drilled for bilateral implantation of guide cannulae (22 gauge; Plastics  
192 One) above the BLA (AP: -3.3, ML:  $\pm$ 4.9, DV: -7.3 from skull surface). Dental cement was used  
193 to anchor the cannulae in place. Once the dental cement was set, an injection needle was lowered  
194 into each cannula (the tip of the injection needle extended 1.5 mm beyond the end of the cannula)  
195 and AAV5-CAMKII $\alpha$ -eHpNR3.0-mCherry or AAV5-CAMKII $\alpha$ -mCherry (University of North  
196 Carolina Vector Core) was infused into the BLA (0.6  $\mu$ l at a rate of 0.5  $\mu$ l/min). A sterile stylet was  
197 inserted into each cannula at the completion of the injections. Rats were given an additional 10  
198 mL of saline and were placed on a heating pad to recover from surgery. Rats were allowed to  
199 recover for one week before being food restricted in preparation for behavioral testing.

### 200 *In vitro electrophysiology*

201 Rats (n = 4) were anesthetized with an intraperitoneal injection of a 75-100 mg/kg  
202 ketamine and 5-10 mg/kg xylazine solution and were decapitated using a small animal guillotine.  
203 Their brains were rapidly extracted and coronal sections containing the BLA (300  $\mu$ m thick) were  
204 obtained using a Leica VT 1000s vibratome while submerged in ice cold sucrose laden  
205 oxygenated artificial cerebrospinal fluid (aCSF) containing in (mM): 2 KCl, 1.25 NaH<sub>2</sub>PO<sub>4</sub>, 1  
206 MgSO<sub>4</sub>, 10 D-glucose, 1 CaCl<sub>2</sub>, 206 sucrose, 25 NaHCO<sub>3</sub>. Slices were then incubated for 30  
207 minutes at 37°C in aCSF which contained in (mM): 124 NaCl, 2.5 KCl, 1.23 NaH<sub>2</sub>PO<sub>4</sub>, 3 MgSO<sub>4</sub>,  
208 10 D-glucose, 1 CaCl<sub>2</sub>, and 25 NaHCO<sub>3</sub>. Following this incubation period slices were allowed to  
209 equilibrate to room temperature for a minimum of 30 minutes prior to being used for experiments.  
210 All solutions were saturated with 95 % O<sub>2</sub>/ 5 % CO<sub>2</sub> to maintain a pH of 7.3. For whole cell patch



## Optogenetic BLA inhibition and risky decision making

211 clamp recordings, slices were transferred to a slice chamber where they were continuously  
212 perfused at a rate of 1.5-2ml/min with an aCSF bath solution that contained (in mM): 126 NaCl, 3  
213 KCl, 1.2 NaH<sub>2</sub>PO<sub>4</sub>, 1.5 MgSO<sub>4</sub>, 11 D-glucose, 2.4 CaCl<sub>2</sub> and 25 NaHCO<sub>3</sub>. This solution was also  
214 saturated with 95 % O<sub>2</sub>/ 5 % CO<sub>2</sub> to maintain a pH of 7.3 and bath temperature was maintained  
215 at 30-32°C. Slices were visualized using infrared differential interference contrast (IR-DIC)  
216 microscopy with an Olympus BX51WI upright stereomicroscope, a 12-bit IRC CCD camera  
217 (QICAM Fast 1394, QImaging), and a 40x water immersion lens. Patch pipettes were prepared  
218 with a Flaming/Brown type pipette puller (Sutter Instrument, P-97) from 1.5 mm/0.8 mm  
219 borosilicate glass capillaries (Sutter Instrument) and pulled to a tip resistance of 4-7 MΩ. Whole  
220 cell patch clamp recordings were performed using an Axon Mutliclamp 700B amplifier (Molecular  
221 Devices, Sunnyvale, CA) and data were collected at 20 kHz, filtered at 2 KHz and recorded with  
222 a Digidata 1322A using Clampex v. 9 or 10 (Molecular Devices, Sunnyvale, CA). BLA neurons  
223 expressing mCherry were identified using an epifluorescence microscopy XF102-2 filter set  
224 (Omega Optical, excitation: 540-580 nm, emission: 615-695 nm). The light source for  
225 epifluorescence microscopy was an X-Cite Series 120Q (Lumen Dynamics). Whole cell patch  
226 clamping was initiated under IR-DIC using a potassium-based internal solution that contained (in  
227 mM): 130 K-gluconate, 10 KCl, 5 NaCl, 2 MgCl<sub>2</sub>, 0.1 EGTA, 2 Na<sub>2</sub>-ATP, 0.3 NaGTP, 10 HEPES  
228 and 10 phosphocreatine, pH adjusted to 7.3 using KOH and volume adjusted to 285–300mOsm.  
229 Halorhodopsin was activated using 1000 msec light pulses, delivered through the excitation filter  
230 in the XF102-2 filter set. Experiments were performed in voltage clamp (at -70 mV), in current  
231 clamp (at I=0), or in current clamp during 100-200 pA current injection that was sufficient to drive  
232 action potentials. Data were analyzed using custom software written in OriginC (OriginLab,  
233 Northampton, MA) by CJF.

### 234 ***Behavioral procedures***

#### 235 *Risky Decision-Making Task*

## Optogenetic BLA inhibition and risky decision making

236 Rats were initially shaped to perform the various components of the decision-making task  
237 (e.g., lever pressing; nosepoking to initiate a trial) as described previously (Orsini et al., 2015a).  
238 They then began training in the Risky Decision-Making task (RDT), which was comprised of three  
239 28-trial blocks and lasted 56 min in duration [this task design was a modification of a similar design  
240 used in our laboratory (Simon et al., 2009; Orsini et al., 2015a)]. Each 40 s trial (Figure 1A) began  
241 with illumination of the nosepoke and houselight. Upon nosepoking, the nosepoke light was  
242 extinguished and either a single lever (forced choice trials) or both levers (free choice trials)  
243 extended into the chamber. If rats failed to nosepoke within 10 s, the trial was considered an  
244 omission. A press on one lever (left or right; counterbalanced across rats) always yielded a small,  
245 “safe” food reward (one food pellet) and a press on the other lever always yielded a large, “risky”  
246 food reward (2 food pellets). Delivery of the large reward was accompanied by a variable  
247 probability of punishment in the form of a mild footshock (0.25-0.6 mA). The probability of  
248 punishment was contingent on a preset probability specific to each block of trials: the probability  
249 in the first block was set to 0% and increased across successive blocks (25%, 75%, respectively).  
250 The large food reward was delivered irrespective of punishment delivery. Although the levers  
251 were counterbalanced across rats, the identities of the small, “safe” lever and large, “risky” lever  
252 remained constant for each rat throughout testing. Each block of trials started with eight forced  
253 choice trials in which a single lever was extended into the chamber. It is through these forced  
254 choice trials that the punishment contingencies for that block were established (four presentations  
255 of each lever, randomly presented). During forced choice trials, the probability of punishment  
256 following a press for the large reward was dependent upon the outcomes of the other forced  
257 choice trial lever presses in that block. For example, in the 25% block, one and only one of the  
258 four forced choice trials (randomly selected) resulted in footshock. Similarly, in the 75% block,  
259 three and only three of those forced choice trials resulted in footshock. The forced choice trials  
260 were followed by 20 free choice trials in which both levers were extended. If rats failed to lever  
261 press within 10 s, the house light was extinguished and the trial was counted as an omission. In

## Optogenetic BLA inhibition and risky decision making

262 contrast to the forced choice trials, the probability of punishment in free choice trials was  
263 independent, such that the shock probability on each trial was the same regardless of shock  
264 delivery on previous trials in that block. During RDT training, shock intensities were adjusted  
265 individually for each rat to ensure that there was sufficient parametric space to observe either  
266 increases or decreases in risk taking during optogenetic inhibition of BLA.

267       Upon reaching stable baseline performance (see *Experimental design and statistical*  
268 *analysis* section for description of stability), rats were lightly anesthetized and optic fibers were  
269 inserted into the BLA cannulae such that they extended 1 mm beyond the tips of the cannulae.  
270 The fibers were cemented into position and dust caps were placed on the fibers to keep them free  
271 from debris. In each subsequent RDT session, spring-insulated patch cords fastened to the rotary  
272 joint were attached to the implanted fibers in the rat. Rats were trained in this manner until their  
273 performance returned to baseline levels (approximately 3 sessions). Upon reaching this criterion,  
274 optogenetic manipulations during test sessions began (note that shock intensities were not  
275 adjusted between baseline and laser stimulation sessions). Laser stimulation occurred during  
276 three different free choice trial phases (Figure 1B): 1) deliberation 2) reward outcome and 3)  
277 intertrial interval (ITI). The deliberation phase consisted of the time between the nosepoke to  
278 trigger lever extension and a lever press, and thus captured the period in which rats were  
279 presumably deciding between the two available options. Laser stimulation commenced 0.5 s prior  
280 to nosepoke illumination and remained on until a lever press occurred or 5 s elapsed, whichever  
281 occurred first. For the reward outcome phase, there were three different stimulation conditions:  
282 1) delivery of the small safe reward 2) delivery of the large reward without punishment and 3)  
283 delivery of the large reward with punishment. During each outcome condition, laser stimulation  
284 began as soon as the rat pressed the lever to yield that outcome and lasted for 5 s. Finally, during  
285 the ITI phase, laser stimulation (5 s) occurred 8-15 s after each reward delivery. A randomized,  
286 within-subjects design was used such that each rat was tested across multiple stimulation phases.

## Optogenetic BLA inhibition and risky decision making

287 Because of attrition due to detachment of headcaps, however, not all rats were tested for all  
288 phases. In between each stimulation session, rats were tethered and tested in the RDT until their  
289 performance in the task across two consecutive sessions was no different from their original  
290 baseline prior to any stimulation. If choice performance shifted during these re-baselining  
291 sessions, shock intensities were adjusted until performance was comparable to the original  
292 baseline.

### 293 *Determination of Shock Intensity Threshold*

294 Upon completion of testing in the RDT, rats in the eNpHR3.0 group underwent test  
295 sessions in which their shock reactivity was assessed under stimulation and non-stimulation  
296 conditions. The procedures were based on those developed by Bonnet and Peterson (1975) to  
297 determine the shock thresholds at which specific motor responses were elicited. These test  
298 sessions occurred across two days, with each day consisting of two tests: one with laser  
299 stimulation and the other without laser stimulation. The order of the test sessions on each day  
300 was counterbalanced across the two days. Irrespective of stimulation condition, each test session  
301 began with a 2 min baseline period followed by delivery of an un signaled footshock (0.4 mA, 1 s),  
302 which decreased spontaneous motor activity and facilitated detection of motor responses at  
303 subsequent low shock intensities. The shock intensity was then set to 0.05 mA and a series of  
304 five footshocks (1 s each), each separated by 10 s, was delivered. After each series of footshocks,  
305 the shock intensity was increased by 0.025 mA. The increase in shock intensities continued until  
306 all motor responses of interest were observed. The shock intensity threshold for a given motor  
307 response was determined by the shock intensity at which the given response was elicited by three  
308 out of the five footshocks in a series. The motor responses for which shock thresholds were  
309 determined consisted of 1) flinch of a paw or a startle response 2) elevation of one or two paws  
310 3) rapid movement of three or all paws. For test sessions with laser stimulation, light was delivered  
311 bilaterally (560 nm, 8-10mW) using the same procedures and system used during decision-

## Optogenetic BLA inhibition and risky decision making

312 making sessions. To mimic parameters used for laser stimulation during delivery of the large,  
313 punished outcome, laser stimulation and footshock were delivered concomitantly, but the laser  
314 remained on for an additional 4 s (total stimulation time of 5 s). Even though no light was delivered  
315 during test sessions without laser stimulation, rats were still tethered for the duration of the test.

### 316 ***Histology and immunohistochemistry***

317 Upon completion of behavioral testing, rats were overdosed with Euthasol and  
318 transcardially perfused with cold 0.1M phosphate-buffered saline (PBS) followed by cold 4%  
319 paraformaldehyde. Brains were extracted and post-fixed in 4% paraformaldehyde for 24 h before  
320 being transferred into a 20% sucrose in 0.1M PBS solution. Brains were sectioned on a cryostat  
321 (35  $\mu$ m) maintained at -20°C. Coronal sections (30  $\mu$ m) were collected in a 1-in-4 series and  
322 placed in wells filled with 0.1M PBS.

323 Immunohistochemistry was performed on free-floating tissue sections and began with  
324 three 10 min washes in 0.1M Tris-buffered saline (TBS). Tissue was then incubated in 3% normal  
325 donkey serum (NDS) and 0.3% Triton-X-100 in 0.1M TBS for 1 h at room temperature. Tissue  
326 was then immediately transferred into primary antibody [rabbit anti-mCherry at 1:1000 (ab167453,  
327 Abcam solution) in 3% NDS and 0.3% Triton-X-100] for 72 hours at 4°C. After primary antibody  
328 incubation, tissue was washed three times in 0.1M TBS for 10 min and then incubated in  
329 secondary antibody solution [donkey anti-rabbit conjugated to Alexa Fluor 488 at 1:300 (A-21206,  
330 Invitrogen) in 3% NDS and 0.3% Triton-X-100) for 2 h at room temperature. Finally, tissue was  
331 washed three times in 0.1M TBS for 10 min and then mounted onto electrostatic slides  
332 (Fisherbrand) in 0.1M TBS. Slides were coverslipped with Prolong Gold Antifade Mountant  
333 (P36941, Invitrogen) and sealed with clear nail polish.

### 334 ***Experimental design and statistical analyses***

## Optogenetic BLA inhibition and risky decision making

335 Using pilot data collected from several eNpHR3.0 rats, a power analysis was conducted  
336 with G\*Power software. This analysis indicated that a sample size of at least 4 rats was required  
337 to detect significant differences between baseline and stimulation conditions with effect sizes of  
338 0.8 and above, assuming an alpha level of 0.05. To account for possible attrition over the course  
339 of the experiment, group sizes were larger than that calculated from the power analysis. A total  
340 of 35 male Long-Evans rats were used in these experiments. Twenty-six rats received intra-BLA  
341 microinjections of the viral vector containing eNpHR3.0, four of which were used for *in vitro*  
342 electrophysiology experiments. Nine rats received intra-BLA microinjections of the viral vector  
343 containing mCherry. Within the eNpHR3.0 group, some rats did not undergo every stimulation  
344 session due to illness or detachment of headcaps over the course of the experiment. In addition,  
345 only a subset of rats (n=6) was used for shock threshold testing. In the control group, there was  
346 attrition due to illness or detachment of headcaps, resulting in only four of the initial nine rats  
347 completing the stimulation sessions. All 4 rats, however, completed all stimulation conditions.

348 Raw data files were analyzed using a customized analysis template written in Graphic  
349 State 4.0 software. This template extracted data for specific task events of interest: numbers of  
350 lever presses during forced and free choice trials, latencies to press levers, latencies to nosepoke,  
351 and numbers of omissions during forced and free choice trials. The behavioral and statistical  
352 procedures were conducted identically for the eNpHR3.0 and control groups. Choice performance  
353 in each block of the RDT was measured as the percentage of free choice trials (each block  
354 consisted of 20 free choice trials; excluding omissions) on which rats chose the large, risky  
355 outcome. Each rat was trained in the RDT until it reached stable baseline performance. Stable  
356 baseline was obtained when the coefficient of variation (CV) for choice of the large, risky outcome  
357 was less than 20% in each block for at least two consecutive sessions. Once this criterion was  
358 met, stimulation sessions commenced. In between each stimulation session, rats were re-trained  
359 in the RDT until their behavior re-stabilized, which was determined using the same criterion. To

## Optogenetic BLA inhibition and risky decision making

360 ensure that the baseline after stimulation was similar to the original baseline (before any  
361 stimulation sessions took place), the CV of the means of each block between baseline sessions  
362 had to fall below 20%. Upon reaching this criterion, rats were advanced to the next stimulation  
363 session. Effects of stimulation (i.e., BLA inhibition) on choice performance were determined using  
364 a two-factor repeated measures ANOVA with session condition (i.e., baseline vs. inhibition) and  
365 trial block as within-subjects factors. In all analyses, a  $p$ -value of 0.05 or less was considered  
366 statistically significant. Latencies to nosepoke to trigger lever extension were measured as the  
367 interval between the illumination of the nosepoke light and a nosepoke response, excluding trials  
368 on which the rat failed to nosepoke altogether (omissions). Using a repeated measures ANOVA,  
369 nosepoke response latencies were specifically compared between baseline and deliberation  
370 stimulation sessions to determine whether laser stimulation (which was initiated 0.5 sec before  
371 nosepoke illumination) affected this aspect of behavior. Effects of BLA inhibition on omissions  
372 during free and forced choice trials were analyzed using a paired  $t$ -test with session condition as  
373 the within-subjects factor.

374 To better understand the effects of BLA inhibition during task phases in which inhibition  
375 significantly affected choice behavior, additional analyses were conducted to determine whether  
376 optogenetic manipulations altered the degree to which feedback from past trials influenced  
377 subsequent choices. Specifically, this analysis provided a measure of how BLA inhibition affected  
378 the likelihood of choosing the large, risky outcome upon receipt of the large reward in the absence  
379 of punishment on the previous trial (win-stay performance) vs. the likelihood of choosing the large,  
380 risky outcome upon receipt of the large reward accompanied by punishment on the previous trial  
381 (lose-shift performance; Bari et al., 2011; St Onge et al., 2011). To perform this analysis, choices  
382 were categorized according to the outcome of the previous trial (large, punished outcome vs.  
383 large, unpunished outcome). Win-stay performance was calculated as the number of trials within  
384 each free choice block in which a rat chose the large, risky lever after receipt of a large,

## Optogenetic BLA inhibition and risky decision making

385 unpunished outcome (win), divided by the total number of free choice trials in which the rat  
386 received a large, unpunished outcome. Similarly, lose-shift performance was calculated as the  
387 number of trials within each free choice block in which a rat chose the small, safe lever after  
388 receipt of a large, punished outcome (lose), divided by the total number of free choice trials in  
389 which the rat received a large, punished outcome. Effects of BLA inhibition on the percentage of  
390 win-stay and lose-shift trials were each analyzed using paired *t*-tests with session (baseline vs.  
391 inhibition) as the within-subjects factor.

392 Shock threshold intensities for the laser stimulation or no laser stimulation sessions were  
393 averaged across the two test days. Analysis of shock intensity thresholds was conducted using a  
394 two-factor repeated measures ANOVA with stimulation condition (inhibition vs. no inhibition) and  
395 motor response as the within-subjects factors. To eliminate the possibility that the order of the  
396 test sessions on each day contributed to differences in shock reactivity thresholds, another  
397 repeated measures ANOVA was conducted using the same within-subjects factors and also  
398 included order of laser stimulation as a between-subjects factor. If either of these parent ANOVAs  
399 resulted in main effects or significant interactions, additional repeated measures ANOVA or paired  
400 *t*-tests were performed to determine the source of significance.

401

## 402 **Results**

### 403 ***In vitro electrophysiology***

404 In slices from rats injected with AAV5-CAMKII $\alpha$ -eHpNR3.0-mCherry, BLA neurons  
405 expressing mCherry were identified with epifluorescence microscopy and recorded from using  
406 conventional whole-cell recording techniques (see *Methods* section). mCherry-positive BLA  
407 neurons (n=11) had a mean whole cell capacitance of  $149 \pm 14.9$  pF. A subset of these neurons  
408 was filled with biocytin, immunolabeled with Alexa-594, and imaged with 2-photon mediated



## Optogenetic BLA inhibition and risky decision making

409 epifluorescence microscopy. Cells examined in this manner were all multipolar and had dense  
410 local dendritic branches within the BLA (Figure 2A). Collectively, these features are consistent  
411 with effective transduction of glutamatergic BLA principal neurons. A 1 s activation of eHpNR3.0  
412 in mCherry-positive BLA neurons voltage clamped at -70 mV (see *Methods* section) produced a  
413 clear outward current which had a peak amplitude of  $117 \pm 29.6$  pA, obtained within ~100 msec  
414 of activation, and a mean amplitude of  $80.0 \pm 20.8$  pA as observed during the last 200 msec of  
415 activation (Figure 2B). Identical stimulation in current clamp ( $I=0$ ) produced a maximum  
416 hyperpolarization of  $-16 \pm 3.1$  mV (also obtained within ~100 msec of activation), and a mean  
417 hyperpolarization of  $-9.0 \pm 2.0$  mV as observed during the last 200 msec of activation (Figure 2C).  
418 This hyperpolarization was sufficient to completely silence 9 out of 11 cells tested when firing  
419 under a 100-200 pA load (Fig. 1D). Firing rate was slowed, but not eliminated, in the other two  
420 cells. Collectively, these results demonstrate that activation of eHpNR3.0 produces robust  
421 functional inhibition of BLA principal neurons.

422

### 423 **Histology**

424 Of the 22 rats that received the viral vector containing eNpHR3.0 for optogenetic  
425 manipulations, one died during surgery and five were euthanized during training due to detached  
426 headcaps. Of the remaining 16 rats, three were excluded due to off-target fiber placements (too  
427 ventral;  $n = 1$ ) or lack of eNpHR3.0 expression in one hemisphere ( $n = 2$ ). Figure 3A displays the  
428 maximum (light gray) and minimum (dark gray) spread of the virus, and Figure 3B depicts the  
429 location of optic fiber tips of rats that were included in the final data analysis. A representative  
430 placement of a fiber tip in the BLA with eNpHR3.0 expression is shown in Figure 3C.

431 Of the 9 rats that received the viral vector containing mCherry alone, one died during  
432 surgery and four were euthanized during training due to detached headcaps, resulting in a final  $n$   
433 = 4. Figure 3D displays the maximum (light gray) and minimum (dark gray) spread of the virus

## Optogenetic BLA inhibition and risky decision making

434 and Figure 3E shows the location of optic fiber tips of control rats that were included in the final  
435 data analysis.

436

### 437 ***Optogenetic BLA inhibition during decision making in eNpHR3.0 rats***

#### 438 *BLA inhibition during deliberation*

439 Optogenetic inhibition of the BLA during deliberation ( $n = 12$ ) caused a significant  
440 decrease in choice of the large, risky outcome [decreased risky choice; inhibition,  $F(1, 11) =$   
441  $14.57$ ,  $p < 0.01$ ; inhibition X trial interaction [ $F(2, 22) = 10.29$ ,  $p < 0.01$ ; Figure 4A]. Importantly,  
442 this effect was only observed in blocks of trials in which there was a risk of punishment: while  
443 there was no effect of inhibition in block 1 [ $t(11) = -1.27$ ,  $p = 0.23$ ], BLA inhibition decreased  
444 choice of the large, risky outcome in both block 2 [ $t(11) = 4.51$ ,  $p < 0.01$ ] and block 3 [ $t(11) =$   
445  $2.16$ ,  $p = 0.05$ ].

446 Additional analyses were performed to determine whether BLA inhibition during  
447 deliberation affected the percentage of win-stay or lose-shift trials (Figure 4B). There was no effect  
448 of inhibition on the percentage of win-stay trials ( $t(8) = 1.61$ ,  $p = 0.15$ ), but there was a near  
449 significant increase in the percentage of lose-shift trials ( $t(9) = -1.99$ ,  $p = 0.08$ ). Note that in the  
450 win-stay analysis, three rats were excluded because they either never chose the large, risky  
451 outcome or never encountered a trial in which they chose the large, risky outcome and received  
452 the large reward without punishment. Similarly, in the lose-shift analysis, two rats were excluded  
453 because they never selected the large, risky outcome. This slight increase in lose-shift trials  
454 suggests that BLA inhibition slightly increased the likelihood for rats to shift their choice to the  
455 small, safe outcome after receiving a large reward accompanied by punishment. Collectively,  
456 these results show that BLA inhibition during the period in which rats deliberated between the two  
457 available options caused an increase in risk aversion.

458 Finally, there was no effect of BLA inhibition during deliberation on omissions in either the  
459 forced choice trials [ $t(11) = -0.87$ ,  $p = 0.44$ ] or the free choice trials [ $t(11) = -0.26$ ,  $p = 0.80$ ].

## Optogenetic BLA inhibition and risky decision making

460 Additional analyses were conducted to determine whether inhibition affected rats' latency to  
461 nosepoke to trigger lever extension. While there was no main effect of inhibition [ $F(1, 11) = 0.05$ ,  
462  $p = 0.82$ ], there was a trend toward a significant inhibition X block interaction [ $F(2, 22) = 3.10$ ,  $p$   
463  $= 0.07$ ], with BLA inhibition causing a slight decrease in latency to nosepoke, particularly in block  
464 3 [mean of 1.87 ( $\pm 0.24$ ) s for baseline; mean of 1.48 ( $\pm 0.15$ ) s for stimulation]. Note, however,  
465 that because light onset commenced 0.5 s before the nosepoke was illuminated to signal the  
466 beginning of a trial, BLA inhibition should have been maximal prior to the start of the deliberation  
467 period.

468

### 469 *BLA inhibition during delivery of the small, safe outcome*

470 Optogenetic inhibition of the BLA during delivery of the small, safe outcome ( $n = 10$ ) had  
471 no effect on choice of the large, risky outcome [inhibition,  $F(1, 9) = 0.09$ ,  $p = 0.77$ ; inhibition X  
472 block,  $F(2, 18) = 1.73$ ,  $p = 0.21$ ; Figure 5A]. Additionally, inhibition had no effect on omissions  
473 (Table 1) during forced choice trials [ $t(9) = -0.32$ ,  $p = 0.76$ ] or during free choice trials [ $t(9) = -$   
474  $0.91$ ,  $p = 0.39$ ]. Hence, BLA inhibition during delivery of the small, safe outcome did not alter  
475 choice behavior.

476

### 477 *BLA inhibition during delivery of the large, unpunished outcome*

478 Similarly, there was no effect of BLA inhibition during the large, unpunished outcome ( $n =$   
479  $9$ ) on choice behavior [inhibition,  $F(1, 8) = 0.45$ ,  $p = 0.52$ ; inhibition X block,  $F(2, 16) = 0.30$ ,  $p$   
480  $= 0.74$ ; Figure 5B]. There were also no effects of inhibition on omissions (Table 1) during forced  
481 choice trials [ $t(8) = 0.50$ ,  $p = 0.63$ ] or free choice trials [ $t(8) = -1.0$ ,  $p = 0.35$ ]. Collectively, these  
482 findings indicate that BLA inhibition during delivery of the large, unpunished outcome did not affect  
483 choice behavior.

484

### 485 *BLA inhibition during delivery of the large, punished outcome*

## Optogenetic BLA inhibition and risky decision making

486 In contrast to BLA inhibition during delivery of the large, unpunished outcome, optogenetic  
487 BLA inhibition during delivery of the large, punished outcome ( $n = 10$ ) significantly increased  
488 choice of the large, risky outcome [inhibition,  $F(1, 9) = 82.75$ ,  $p < 0.01$ ; inhibition X block,  $F(1, 9)$   
489  $= 39.22$ ,  $p < 0.01$ ; Figure 6A]. It is important to note that this analysis only used choice behavior  
490 in the 25% and 75% blocks from baseline and stimulation sessions, as they were the only blocks  
491 in which BLA inhibition could occur.

492 Given the significant effects of BLA inhibition during this phase of the task, additional  
493 analyses were performed to determine how this manipulation affected the percentage of win-stay  
494 or lose-shift trials (Figure 6B). There was no effect of BLA inhibition on the percentage of win/stay  
495 trials [ $t(9) = -0.44$ ,  $p = 0.67$ ]; however, there was a significant decrease in the percentage of  
496 lose/shift trials [ $t(9) = 3.02$ ,  $p = 0.01$ ] compared to baseline. Thus, BLA inhibition during delivery  
497 of the large, punished outcome caused rats to increase the likelihood of choosing the large, risky  
498 outcome, despite having been punished for this choice on the preceding trial.

499 Lastly, there were no effects of BLA inhibition on omissions (Table 1) during free choice  
500 trials [ $t(9) = 0.09$ ,  $p = 0.93$ ], although inhibition did cause a significant decrease in omissions  
501 during forced choice trials compared to baseline conditions [ $t(9) = 2.56$ ,  $p = 0.03$ ].

502

### 503 *BLA inhibition during shock threshold testing*

504 Rather than affecting processes related to risk taking *per se*, the effects of BLA inhibition  
505 during delivery of the large, punished outcome may have been due to an inhibition-induced  
506 decrease in shock sensitivity. To address this, a subset of rats ( $n = 6$ ) was tested in a behavioral  
507 assay that evaluates the thresholds at which selective motor responses (as described in the  
508 *Methods* section) are elicited by shock delivery. These thresholds were obtained under stimulation  
509 and no stimulation (inhibition vs. no inhibition, respectively) conditions (Figure 6C). A two-factor  
510 repeated measures ANOVA revealed neither a main effect of inhibition [ $F(1, 5) = 4.00$ ,  $p = 0.10$ ]  
511 nor an inhibition X motor response interaction [ $F(2, 10) = 0.04$ ,  $p = 0.96$ ]. Thus, the increase in

## Optogenetic BLA inhibition and risky decision making

512 risky choice during sessions in which BLA inhibition occurred during delivery of the large,  
513 punished outcome cannot be accounted for by a decrease in footshock sensitivity.

514

### 515 *BLA inhibition during ITIs*

516 Optogenetic inhibition of the BLA during the ITI ( $n = 13$ ) had no effect on choice of the  
517 large, risky outcome [inhibition,  $F(1, 12) = 0.01$ ,  $p = 0.91$ ; inhibition X block,  $F(2, 24) = 0.02$ ,  $p =$   
518  $0.98$ ; Figure 5C]. Similarly, BLA inhibition during ITIs did not affect omissions during forced choice  
519 trials [ $t(12) = 0.3$ ,  $p = 0.77$ ], but caused a near significant increase in omissions during free choice  
520 trials [ $t(12) = -2.04$ ,  $p = 0.06$ ].

521

### 522 ***Optogenetic BLA stimulation during decision making in control rats***

523 To ensure that the effects of BLA inhibition were not due to light delivery alone, another  
524 group of rats received intra-BLA microinjections of a vector carrying mCherry alone and were then  
525 trained in the RDT. Because BLA inhibition only altered choice behavior during deliberation and  
526 delivery of the large, punished outcome in eNpHR3.0 rats, control rats only received stimulation  
527 during these two phases (in separate sessions, in a randomized order across rats).

528

### 529 *BLA stimulation during deliberation*

530 BLA stimulation during deliberation ( $n = 4$ ) had no effect on choice of the large, risky  
531 outcome compared to baseline conditions [stimulation,  $F(1, 3) = 1.00$ ,  $p = 0.39$ ; stimulation X  
532 block,  $F(2, 6) = 1.00$ ,  $p = 0.42$ ; Figure 7A]. There was no main effect of BLA stimulation on latency  
533 to nosepoke to initiate lever extension [ $F(1, 3) = 2.33$ ,  $p = 0.23$ ; Table 1]; however, it appeared  
534 that under stimulation conditions, latency to nosepoke did increase across the session [ $F(2, 6) =$   
535  $7.70$ ,  $p = 0.02$ ]. While there was a trend toward a significant effect of stimulation on omissions  
536 (Table 1) during forced choice trials [ $t(3) = -2.82$ ,  $p = 0.07$ ], this was due to the fact that there  
537 were fewer omissions under stimulation compared to baseline conditions. There were no effects

## Optogenetic BLA inhibition and risky decision making

538 of BLA stimulation on omissions during free choice trials [ $t(3) = 1.00, p = 0.39$ ]. Collectively, these  
539 results indicate that laser stimulation of BLA alone during deliberation did not affect risky decision  
540 making in control rats.

541

### 542 *BLA stimulation during delivery of the large, punished outcome*

543 There was also no effect of BLA stimulation during delivery of the large, punished outcome  
544 ( $n = 4$ ) on choice of the large, risky outcome [stimulation,  $F(1, 3) = 1.00, p = 0.39$ ; stimulation X  
545 block,  $F(2, 6) = 1.0, p = 0.42$ ; Figure 7B]. There was a trend toward a significant effect of  
546 stimulation on omissions (Table 1) during forced choice trials [ $t(3) = -2.82, p = 0.07$ ]; however,  
547 this again appeared to be due to fewer omissions under stimulation compared to baseline  
548 conditions. There were no differences in omissions during free choice trials between stimulation  
549 and baseline conditions [ $t(3) = 1.67, p = 0.19$ ]. Hence, laser stimulation of BLA alone during  
550 delivery of the large, punished outcome had no effect on risky decision making in control rats.

551

## 552 **Discussion**

553 Decision making involves coordination of multiple cognitive functions to generate choice  
554 behavior. While there is a growing body of literature delineating the neural substrates governing  
555 decision making, less is known about how and when such brain regions are engaged during the  
556 decision process. The current study demonstrates that the BLA plays distinct roles during different  
557 components of risky decision making. Whereas optogenetic inhibition of the BLA during  
558 deliberation resulted in a decrease in choice of the large, risky outcome (decreased risky choice),  
559 BLA inhibition during delivery of the large, punished outcome had the opposite effect (increased  
560 risky choice). These effects were specific to the task phase in which inhibition occurred because  
561 BLA inhibition had no effect on choice behavior during delivery of the small, safe outcome, the  
562 large, unpunished outcome, or the ITI. Further, there were no effects of light delivery into the BLA

## Optogenetic BLA inhibition and risky decision making

563 during deliberation or delivery of the large, punished outcome in control rats (in the absence of  
564 eNpHR3.0).

565         The overall finding that BLA manipulation alters choice performance during risky decision  
566 making is consistent with previous studies implicating this region in cost/benefit decision making.  
567 In a risky decision making task involving choices between a small, certain food reward and a  
568 large, probabilistic food reward, pharmacological inactivation of BLA decreased choice of the  
569 large, probabilistic reward, but only at probabilities at which it was more profitable to choose this  
570 reward (Ghods-Sharifi et al., 2009). Consistent with this, BLA lesions induce a pattern of  
571 disadvantageous choice behavior in another rodent model of risky decision making designed to  
572 simulate the Iowa Gambling Task (Zeeb and Winstanley, 2011). More recently, we showed that  
573 BLA lesions increase risky choice in the RDT (Orsini et al., 2015a), and control experiments  
574 suggested that this increase was due to impaired integration of reward magnitude and  
575 punishment-related information. Given the complexity of the decision-making process, however,  
576 the use of lesions and pharmacological inactivation, while informative, may obscure a complete  
577 understanding of how the BLA is engaged during the course of individual decisions.

578         To circumvent this issue, the current study employed optogenetics to selectively inhibit the  
579 BLA during distinct phases of the decision-making process. In contrast to effects of permanent  
580 BLA lesions (Orsini et al. 2015a), optogenetic inhibition caused both an increase *and* decrease in  
581 risky choice depending on the timepoint at which inhibition occurred. These results suggest that  
582 the contribution of the BLA to risky choice is not uniform, but instead that it may function in different  
583 capacities even over the course of a few seconds of a decision-making trial. During deliberation,  
584 various sources of information must be assimilated to bias behavior toward a specific choice. In  
585 particular, information about the anticipated rewarding aspects of each potential outcome must  
586 be integrated and weighed against the negative/adverse aspects of those outcomes. BLA  
587 inhibition during this period interfered with this integrative process such that choices were more  
588 strongly biased by punishment-related information. One possibility is that this is due to a loss of

## Optogenetic BLA inhibition and risky decision making

589 reward magnitude information, although this seems unlikely given that choice behavior was intact  
590 in the first block of trials (in which there was no risk of punishment). Alternatively, and consistent  
591 with the slight increase in lose-shift trials, BLA inhibition may have augmented the salience of the  
592 punishment associated with the large reward. This also seems unlikely, however, given that  
593 lesions and pharmacological inactivation of the BLA reduce fear expression in other contexts  
594 (Helmstetter and Bellgowan, 1994; Maren et al., 1996). A final, and more likely possibility is that  
595 BLA inhibition during deliberation may have attenuated the incentive salience of anticipated  
596 outcomes and, consequently, the ability to bias action selection toward more salient rewards.  
597 Hence, the BLA may be important for tagging available outcomes based on their incentive  
598 salience (i.e., to favor larger, albeit riskier, outcomes). In the absence of an intact BLA, the  
599 punishment history and/or aversive properties of these outcomes prevail and drive choice  
600 behavior.

601         In contrast, the increase in risk-taking following BLA inhibition during delivery of the large,  
602 punished outcome suggests that the BLA is engaged in a manner different from that during  
603 deliberation. Incorporating feedback about outcomes of past choices to guide future choice is a  
604 critical aspect of adaptive decision making. The BLA has long been implicated in encoding and  
605 representing aversive properties of stimuli in Pavlovian and instrumental learning tasks (Wassum  
606 and Izquierdo, 2015). Thus, inhibition during delivery of the large, punished outcome may have  
607 prevented the BLA from encoding the punishing aspects of this outcome and therefore impaired  
608 the ability to use this information as feedback to adjust future choice behavior. This would result  
609 in choice performance being driven by rewarding properties of this outcome, irrespective of  
610 whether its delivery was accompanied by footshock. This is supported by the significant decrease  
611 in lose-shift trials such that rats continued to choose the large, risky outcome despite having been  
612 punished on the preceding trial. Importantly, the effects of BLA inhibition during this phase were  
613 not due to alterations in shock sensitivity, as there were no changes in thresholds at which shock-  
614 induced motor responses were elicited. This is consistent with previous work showing that BLA



## Optogenetic BLA inhibition and risky decision making

615 lesions do not affect discrimination between punished and unpunished rewards of the same  
616 magnitude (Orsini et al., 2015a) and when considered together, demonstrates that the BLA is not  
617 necessary for encoding shock alone. Collectively, these data suggest that when a rewarding  
618 outcome is accompanied by an adverse consequence, the BLA may be responsible for encoding  
619 the negative aspects of that outcome that can then be used as feedback during future deliberation.

620         The idea that the BLA functions in a heterogeneous manner during risky decision making  
621 is consistent with previous work showing that BLA neurons that encode outcomes of different  
622 valences are segregated into distinct populations (Schoenbaum et al., 1998; Paton et al., 2006;  
623 Belova et al., 2007; Belova et al., 2008; Shabel and Janak, 2009; Sangha et al., 2013; Zhang et  
624 al., 2013; Namburi et al., 2015; Beyeler et al., 2016). Aversive and appetitive outcomes are  
625 predominantly represented by separate BLA cell populations (Namburi et al., 2015; Beyeler et al.,  
626 2016), suggesting that the functional heterogeneity of the BLA during risky decision making could  
627 arise from distinct neuronal populations representing incentive salience (positive-value neurons)  
628 vs. aversive properties (negative-value neurons) of choice outcomes. The current data further  
629 suggest that these separate populations are differentially engaged depending on the phase of the  
630 decision process. Thus, positive-value neurons may be important during the deliberative process  
631 for signaling the incentive salience of possible outcomes, whereas negative-value neurons may  
632 be critical for sensitivity to negative feedback. It is not clear, however, whether these separate  
633 populations of neurons interact with one another and if so, when and where this interaction occurs.

634         If, in fact, these distinct neuronal populations are differentially engaged during decision  
635 making, how do they ultimately affect choice behavior? One possibility is that the positive- and  
636 negative-value neurons have divergent and non-overlapping downstream targets. Indeed, BLA  
637 neurons that project to the nucleus accumbens (NAc) selectively support reward conditioning  
638 whereas BLA neurons that project to the central nucleus of the amygdala (CeA) selectively  
639 support fear conditioning (Namburi et al., 2015; Beyeler et al., 2016). While the BLA-NAc  
640 projection is implicated in risky decision making (St Onge et al., 2012), the contribution of the

## Optogenetic BLA inhibition and risky decision making

641 BLA-CeA circuit is unknown. It is also possible that putative positive- and negative-value BLA  
642 neurons modulate risky choice through divergent projections to the core and shell subregions of  
643 the NAc, respectively. This hypothesis is consistent with the canonical theory that the NAc core  
644 (NAcC) is important for facilitating approach behavior whereas the NAc shell (NAcSh) is required  
645 for suppressing ongoing behavior (Floresco, 2014). This functional dichotomy extends to  
646 instrumental tasks involving conflict or punishment: NAcSh inactivation increases punished  
647 responding (Piantadosi et al., 2017) and decreases avoidance responses (Fernando et al., 2014),  
648 whereas NAcC inactivation decreases overall reward-seeking, irrespective of accompanying  
649 punishment (Piantadosi et al., 2017). Further evidence indicates that these distinct functions are  
650 modulated by BLA input. For example, activation of the BLA-NAcC pathway drives reward-  
651 seeking behavior (Ambroggi et al., 2008; Stuber et al., 2011; Namburi et al., 2015) and interruption  
652 of this circuit impairs reward conditioning and decision making (Ambroggi et al., 2008; Stuber et  
653 al., 2011; St Onge et al., 2012). In contrast, the BLA-NAcSh, but not the BLA-NAcC, pathway  
654 supports active avoidance behavior (Ramirez et al., 2015). Thus, positive-encoding BLA neurons  
655 may contribute to the deliberative process via their downstream connections with the NAcC and  
656 negative-encoding BLA neurons may provide negative feedback information through their  
657 interactions with the NAcSh. Interestingly, it has been proposed that networks of inhibitory BLA  
658 interneurons may play a permissive role in determining which neuronal circuits are engaged  
659 during motivated behavior (Janak and Tye, 2015), which could allow flexible shifts in choice  
660 behavior as reward or punishment contingencies change.

661 To our knowledge, this study is the first to demonstrate multiple roles for the BLA in  
662 decision making depending on the phase of the decision process engaged. These results highlight  
663 the need to use more temporally targeted manipulations to understand the neural circuitry  
664 supporting complex cognitive operations. More importantly, these findings provide a more refined  
665 understanding of how the BLA contributes to risk-based decision making, and a foundation for  
666 future work on development of novel approaches for remediating maladaptive choice behavior.

## Optogenetic BLA inhibition and risky decision making

### 667 **Figure Captions:**

668 **Figure 1: Design of the Risky Decision-Making Task. A.** Each block consists of 8 forced choice  
669 trials and 20 free choice trials. Each free choice trial consists of a deliberation and outcome phase.  
670 Rats must nosepoke for the extension of either one lever (forced choice trial) or both levers (free  
671 choice trial). A press on one lever yields a small safe reward and a press on the other yields a  
672 large reward accompanied by variable probabilities of footshock punishment. **B.** Optogenetic  
673 stimulation occurred at one of five possible phases during each free choice trial (with stimulation  
674 during each test session taking place in only one of the five phases). Green bars indicate periods  
675 of laser stimulation.

676

677 **Figure 2. Functional validation of eNpHR3.0 in the BLA. A.** Two-photon z-series projection of  
678 a mCherry-positive BLA neuron filled with biocytin and immunolabeled with Alexa-594. **B.**  
679 mCherry-positive cells (n=11) voltage clamped at -70 mV show an increase in holding current  
680 upon light stimulation (yellow line) and return to baseline holding current upon light termination.  
681 Black line indicates the mean response and shaded area indicates SEM. **C.** mCherry-positive  
682 cells (n=11) current clamped at 0 pA show hyperpolarization upon light stimulation and return to  
683 resting membrane potential upon light termination. Black line indicates the mean response and  
684 shaded area indicates SEM. **D.** A representative mCherry-positive cell that was current clamped  
685 at 0 pA shows an increase in firing rate upon injection of a +150 pA current pulse, which is  
686 effectively suppressed during light delivery.

687

688 **Figure 3. eNpHR3.0 expression and optic fiber placement in the BLA. A.** Schematic depicting  
689 the maximum (light gray) and minimum (dark gray) spread of eNpHR3.0 expression in the BLA.  
690 **B.** Optic fiber placements in the BLA. Black circles represent the tips of the optic fibers. **C.**  
691 Representative micrograph depicting eNpHR3.0 expression and the tip of the optic fiber in the  
692 BLA. Dashed white line represents the borders of the BLA. **D.** Schematic depicting the maximum

## Optogenetic BLA inhibition and risky decision making

693 (light gray) and minimum (dark gray) spread of mCherry expression in the BLA of control rats. **E.**  
694 Optic fiber placements in the BLA in control rats. Black circles represent the tips of the optic fibers.  
695

696 **Figure 4. BLA inhibition during deliberation decreases risky choice.** **A.** BLA inhibition  
697 decreases choice of the large, risky outcome. **B.** There were no effects of BLA inhibition on win-  
698 stay trials. In contrast, there was a near-significant increase in lose-shift trials upon BLA inhibition.  
699 Data are represented as mean  $\pm$  standard error of mean (SEM). An asterisk indicates a significant  
700 difference and a cross indicates a trend ( $p = 0.08$ ) toward a significant difference between  
701 inhibition and baseline (no laser) conditions.

702  
703 **Figure 5. BLA inhibition has no effect on risky choice during other task phases.** **A.** BLA  
704 inhibition during delivery of the small, safe outcome did not affect choice of the large, risky  
705 outcome. **B.** BLA inhibition during delivery of the large, unpunished outcome had no effect on  
706 choice of the large, risky outcome. **C.** BLA inhibition during the ITI had no effect on choice of the  
707 large, risky outcome. Data are represented as mean  $\pm$  SEM.

708  
709 **Figure 6. BLA inhibition during delivery of the large, punished outcome increases risky**  
710 **choice.** **A.** BLA inhibition increased choice of the large, risky outcome. **B.** There was no effect of  
711 BLA inhibition on win-stay performance. In contrast, BLA inhibition decreased lose-shift  
712 performance. **C.** BLA inhibition did not alter the intensity thresholds at which shock elicited a flinch,  
713 elevation of 1-2 paws, or rapid movement of 3 or all paws. Data are represented as mean  $\pm$  SEM.  
714 Asterisks indicate a significant difference between inhibition and baseline (no laser) conditions.

715  
716 **Figure 7. Laser stimulation of the BLA has no effect on risky choice in control rats.** **A.** In  
717 rats injected with vectors carrying mCherry alone, BLA stimulation during deliberation did not  
718 affect choice of the large, risky outcome. **B.** BLA stimulation during delivery of the large, punished

## Optogenetic BLA inhibition and risky decision making

719 outcome had no effect on choice of the large, risky outcome. Data are represented as mean  $\pm$

720 SEM.

721

722

723

724

725

726

727

728

729

730

731

732

733

734

735

736

737

738

739

740

741

742

743

744

745 **References**

- 746 Ambroggi F, Ishikawa A, Fields HL, Nicola SM (2008) Basolateral amygdala neurons facilitate  
747 reward-seeking behavior by exciting nucleus accumbens neurons. *Neuron* 59:648-661.
- 748 Bari A, Mar AC, Theobald DE, Elands SA, Oganya KC, Eagle DM, Robbins TW (2011)  
749 Prefrontal and monoaminergic contributions to stop-signal task performance in rats. *The*  
750 *Journal of neuroscience : the official journal of the Society for Neuroscience* 31:9254-  
751 9263.
- 752 Bechara A, Damasio H (2002) Decision-making and addiction (part I): impaired activation of  
753 somatic states in substance dependent individuals when pondering decisions with  
754 negative future consequences. *Neuropsychologia* 40:1675-1689.
- 755 Belova MA, Paton JJ, Salzman CD (2008) Moment-to-moment tracking of state value in the  
756 amygdala. *The Journal of neuroscience : the official journal of the Society for*  
757 *Neuroscience* 28:10023-10030.
- 758 Belova MA, Paton JJ, Morrison SE, Salzman CD (2007) Expectation modulates neural  
759 responses to pleasant and aversive stimuli in primate amygdala. *Neuron* 55:970-984.
- 760 Beyeler A, Namburi P, Glober GF, Simonnet C, Calhoun GG, Conyers GF, Luck R, Wildes CP,  
761 Tye KM (2016) Divergent Routing of Positive and Negative Information from the  
762 Amygdala during Memory Retrieval. *Neuron* 90:348-361.
- 763 Crowley TJ, Dalwani MS, Mikulich-Gilbertson SK, Du YP, Lejuez CW, Raymond KM, Banich MT  
764 (2010) Risky decisions and their consequences: neural processing by boys with  
765 Antisocial Substance Disorder. *PloS one* 5:e12835.
- 766 De Martino B, Kumaran D, Seymour B, Dolan RJ (2006) Frames, biases, and rational decision-  
767 making in the human brain. *Science* 313:684-687.
- 768 Dekkers TJ, Popma A, Agelink van Rentergem JA, Bexkens A, Huizenga HM (2016) Risky  
769 decision making in Attention-Deficit/Hyperactivity Disorder: A meta-regression analysis.  
770 *Clin Psychol Rev* 45:1-16.
- 771 Fernando AB, Urcelay GP, Mar AC, Dickinson TA, Robbins TW (2014) The role of the nucleus  
772 accumbens shell in the mediation of the reinforcing properties of a safety signal in free-  
773 operant avoidance: dopamine-dependent inhibitory effects of d-amphetamine.  
774 *Neuropsychopharmacology : official publication of the American College of*  
775 *Neuropsychopharmacology* 39:1420-1430.
- 776 Floresco SB (2014) The Nucleus Accumbens: An Interface Between Cognition, Emotion, and  
777 Action. *Annual review of psychology*.
- 778 Ghods-Sharifi S, St Onge JR, Floresco SB (2009) Fundamental contribution by the basolateral  
779 amygdala to different forms of decision making. *The Journal of neuroscience : the official*  
780 *journal of the Society for Neuroscience* 29:5251-5259.
- 781 Gonzalez R, Schuster RM, Mermelstein RM, Diviak KR (2015) The role of decision-making in  
782 cannabis-related problems among young adults. *Drug and alcohol dependence* 154:214-  
783 221.
- 784 Gore F, Schwartz EC, Brangers BC, Aladi S, Stujenske JM, Likhtik E, Russo MJ, Gordon JA,  
785 Salzman CD, Axel R (2015) Neural Representations of Unconditioned Stimuli in  
786 Basolateral Amygdala Mediate Innate and Learned Responses. *Cell* 162:134-145.
- 787 Gowin JL, Mackey S, Paulus MP (2013) Altered risk-related processing in substance users:  
788 Imbalance of pain and gain. *Drug and alcohol dependence* 132:13-21.
- 789 Grabenhorst F, Hernadi I, Schultz W (2012) Prediction of economic choice by primate amygdala  
790 neurons. *Proceedings of the National Academy of Sciences of the United States of*  
791 *America* 109:18950-18955.

## Optogenetic BLA inhibition and risky decision making

- 792 Helmstetter FJ, Bellgowan PS (1994) Effects of muscimol applied to the basolateral amygdala  
793 on acquisition and expression of contextual fear conditioning in rats. *Behavioral*  
794 *neuroscience* 108:1005-1009.
- 795 Hernadi I, Grabenhorst F, Schultz W (2015) Planning activity for internally generated reward  
796 goals in monkey amygdala neurons. *Nature neuroscience* 18:461-469.
- 797 Hosking JG, Cocker PJ, Winstanley CA (2014) Dissociable contributions of anterior cingulate  
798 cortex and basolateral amygdala on a rodent cost/benefit decision-making task of  
799 cognitive effort. *Neuropsychopharmacology : official publication of the American College*  
800 *of Neuropsychopharmacology* 39:1558-1567.
- 801 Janak PH, Tye KM (2015) From circuits to behaviour in the amygdala. *Nature* 517:284-292.
- 802 Kaye WH, Wierenga CE, Bailer UF, Simmons AN, Bischoff-Grethe A (2013) Nothing tastes as  
803 good as skinny feels: the neurobiology of anorexia nervosa. *Trends in neurosciences*  
804 36:110-120.
- 805 Maren S, Aharonov G, Fanselow MS (1996) Retrograde abolition of conditional fear after  
806 excitotoxic lesions in the basolateral amygdala of rats: absence of a temporal gradient.  
807 *Behavioral neuroscience* 110:718-726.
- 808 Najavits LM, Meyer T, Johnson KM, Korn D (2011) Pathological gambling and posttraumatic  
809 stress disorder: a study of the co-morbidity versus each alone. *J Gambl Stud* 27:663-  
810 683.
- 811 Namburi P, Beyeler A, Yorozu S, Calhoun GG, Halbert SA, Wichmann R, Holden SS, Mertens  
812 KL, Anahtar M, Felix-Ortiz AC, Wickersham IR, Gray JM, Tye KM (2015) A circuit  
813 mechanism for differentiating positive and negative associations. *Nature* 520:675-678.
- 814 Orsini CA, Trotta RT, Bizon JL, Setlow B (2015a) Dissociable Roles for the Basolateral  
815 Amygdala and Orbitofrontal Cortex in Decision-Making under Risk of Punishment. *The*  
816 *Journal of neuroscience : the official journal of the Society for Neuroscience* 35:1368-  
817 1379.
- 818 Orsini CA, Moorman DE, Young JW, Setlow B, Floresco SB (2015b) Neural mechanisms  
819 regulating different forms of risk-related decision-making: Insights from animal models.  
820 *Neuroscience and biobehavioral reviews*.
- 821 Paton JJ, Belova MA, Morrison SE, Salzman CD (2006) The primate amygdala represents the  
822 positive and negative value of visual stimuli during learning. *Nature* 439:865-870.
- 823 Piantadosi PT, Yeates DC, Wilkins M, Floresco SB (2017) Contributions of basolateral  
824 amygdala and nucleus accumbens subregions to mediating motivational conflict during  
825 punished reward-seeking. *Neurobiology of learning and memory* 140:92-105.
- 826 Ramirez F, Moscarello JM, LeDoux JE, Sears RM (2015) Active avoidance requires a serial  
827 basal amygdala to nucleus accumbens shell circuit. *The Journal of neuroscience : the*  
828 *official journal of the Society for Neuroscience* 35:3470-3477.
- 829 Rangel A, Camerer C, Montague PR (2008) A framework for studying the neurobiology of value-  
830 based decision making. *Nature reviews Neuroscience* 9:545-556.
- 831 Roiser JP, de Martino B, Tan GC, Kumaran D, Seymour B, Wood NW, Dolan RJ (2009) A  
832 genetically mediated bias in decision making driven by failure of amygdala control. *The*  
833 *Journal of neuroscience : the official journal of the Society for Neuroscience* 29:5985-  
834 5991.
- 835 Sangha S, Chadick JZ, Janak PH (2013) Safety encoding in the basal amygdala. *The Journal of*  
836 *neuroscience : the official journal of the Society for Neuroscience* 33:3744-3751.
- 837 Schneider S et al. (2012) Risk taking and the adolescent reward system: a potential common  
838 link to substance abuse. *The American journal of psychiatry* 169:39-46.
- 839 Schoenbaum G, Chiba AA, Gallagher M (1998) Orbitofrontal cortex and basolateral amygdala  
840 encode expected outcomes during learning. *Nature neuroscience* 1:155-159.

## Optogenetic BLA inhibition and risky decision making

- 841 Schoenbaum G, Chiba AA, Gallagher M (1999) Neural encoding in orbitofrontal cortex and  
842 basolateral amygdala during olfactory discrimination learning. *The Journal of*  
843 *neuroscience : the official journal of the Society for Neuroscience* 19:1876-1884.
- 844 Shabel SJ, Janak PH (2009) Substantial similarity in amygdala neuronal activity during  
845 conditioned appetitive and aversive emotional arousal. *Proceedings of the National*  
846 *Academy of Sciences of the United States of America* 106:15031-15036.
- 847 Simon NW, Gilbert RJ, Mayse JD, Bizon JL, Setlow B (2009) Balancing risk and reward: a rat  
848 model of risky decision making. *Neuropsychopharmacology : official publication of the*  
849 *American College of Neuropsychopharmacology* 34:2208-2217.
- 850 St Onge JR, Abhari H, Floresco SB (2011) Dissociable contributions by prefrontal D1 and D2  
851 receptors to risk-based decision making. *The Journal of neuroscience : the official*  
852 *journal of the Society for Neuroscience* 31:8625-8633.
- 853 St Onge JR, Stopper CM, Zahm DS, Floresco SB (2012) Separate prefrontal-subcortical circuits  
854 mediate different components of risk-based decision making. *The Journal of*  
855 *neuroscience : the official journal of the Society for Neuroscience* 32:2886-2899.
- 856 Stuber GD, Sparta DR, Stamatakis AM, van Leeuwen WA, Hardjoprajitno JE, Cho S, Tye KM,  
857 Kempadoo KA, Zhang F, Deisseroth K, Bonci A (2011) Excitatory transmission from the  
858 amygdala to nucleus accumbens facilitates reward seeking. *Nature* 475:377-380.
- 859 Tremblay M, Cocker PJ, Hosking JG, Zeeb FD, Rogers RD, Winstanley CA (2014) Dissociable  
860 effects of basolateral amygdala lesions on decision making biases in rats when loss or  
861 gain is emphasized. *Cogn Affect Behav Neurosci* 14:1184-1195.
- 862 Wassum KM, Izquierdo A (2015) The basolateral amygdala in reward learning and addiction.  
863 *Neuroscience and biobehavioral reviews* 57:271-283.
- 864 Winstanley CA, Floresco SB (2016) Deciphering Decision Making: Variation in Animal Models of  
865 Effort- and Uncertainty-Based Choice Reveals Distinct Neural Circuitries Underlying  
866 Core Cognitive Processes. *The Journal of neuroscience : the official journal of the*  
867 *Society for Neuroscience* 36:12069-12079.
- 868 Winstanley CA, Theobald DE, Cardinal RN, Robbins TW (2004) Contrasting roles of basolateral  
869 amygdala and orbitofrontal cortex in impulsive choice. *The Journal of neuroscience : the*  
870 *official journal of the Society for Neuroscience* 24:4718-4722.
- 871 Zeeb FD, Winstanley CA (2011) Lesions of the basolateral amygdala and orbitofrontal cortex  
872 differentially affect acquisition and performance of a rodent gambling task. *The Journal*  
873 *of neuroscience : the official journal of the Society for Neuroscience* 31:2197-2204.
- 874 Zhang W, Schneider DM, Belova MA, Morrison SE, Paton JJ, Salzman CD (2013) Functional  
875 circuits and anatomical distribution of response properties in the primate amygdala. *The*  
876 *Journal of neuroscience : the official journal of the Society for Neuroscience* 33:722-733.



Figure 1

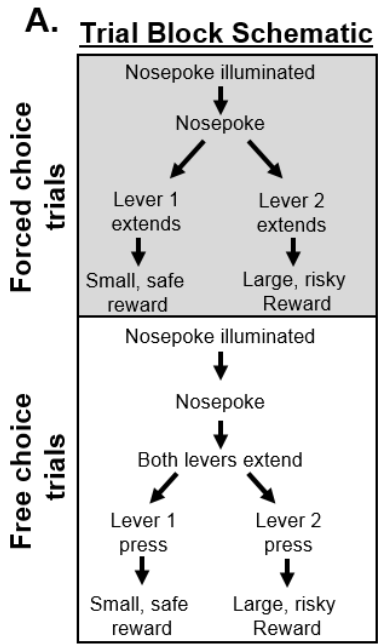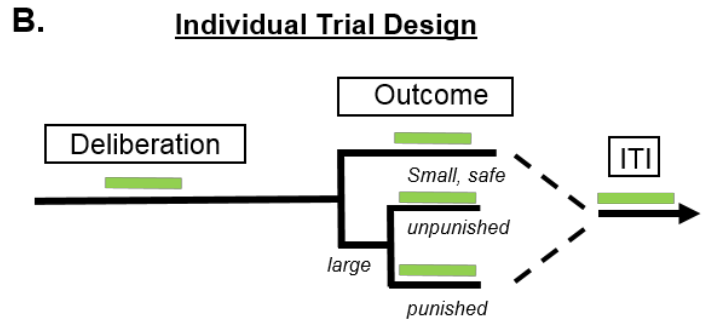

Figure 2

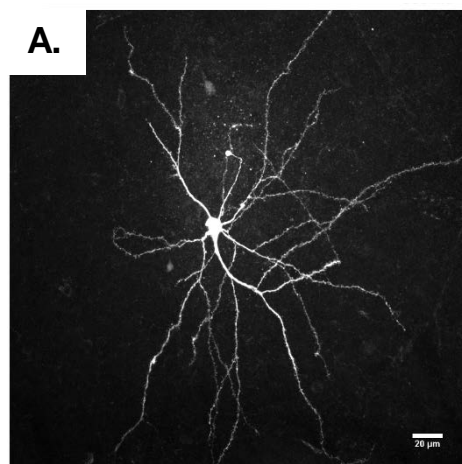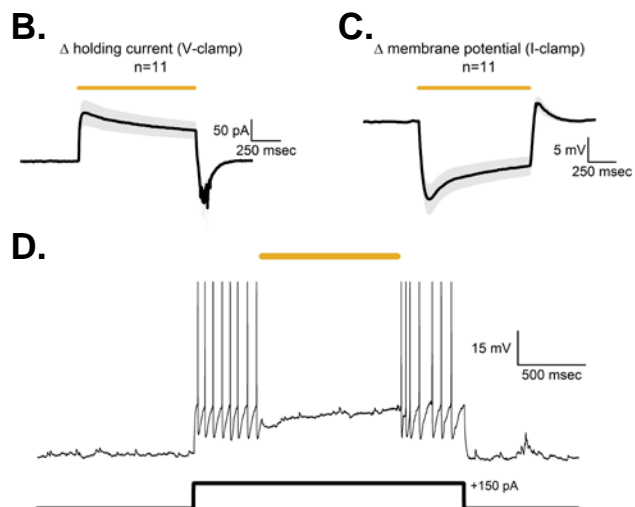

Figure 3

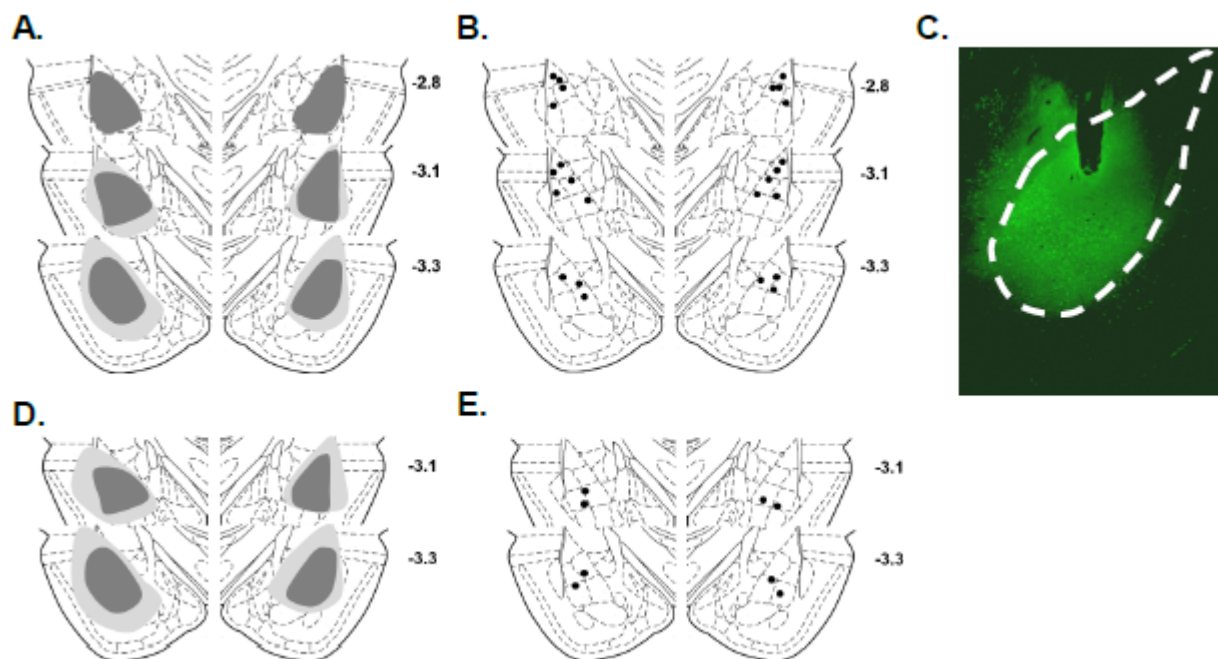

Figure 4

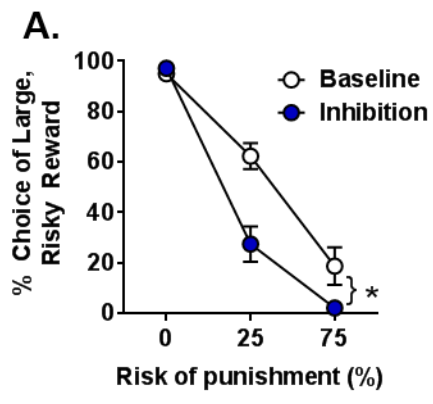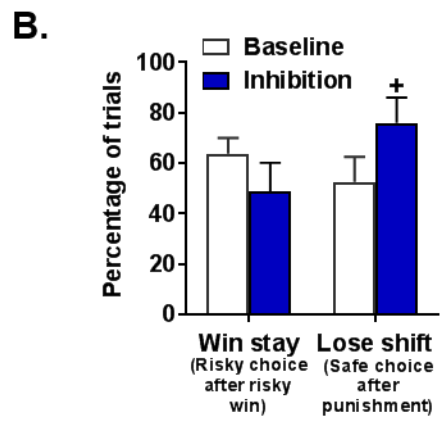

Figure 5

A.

**Small, safe outcome**

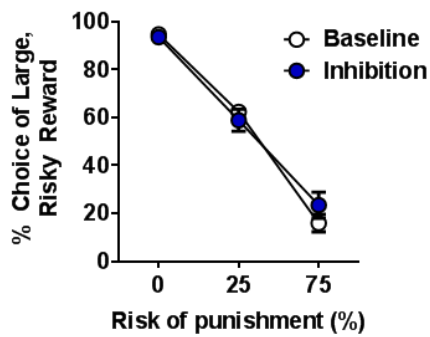

B.

**Large, unpunished outcome**

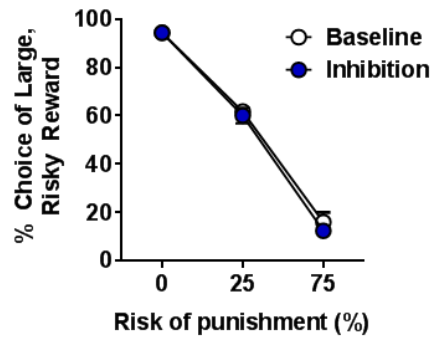

C.

**Intertrial interval**

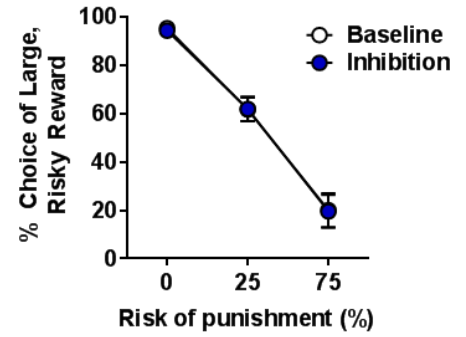

Figure 6

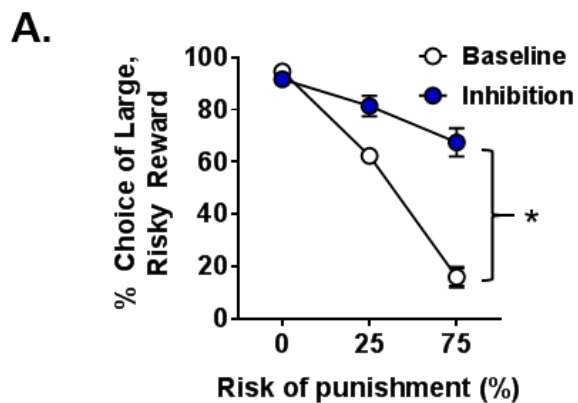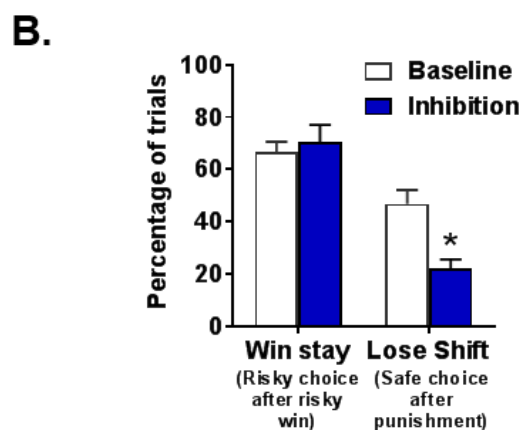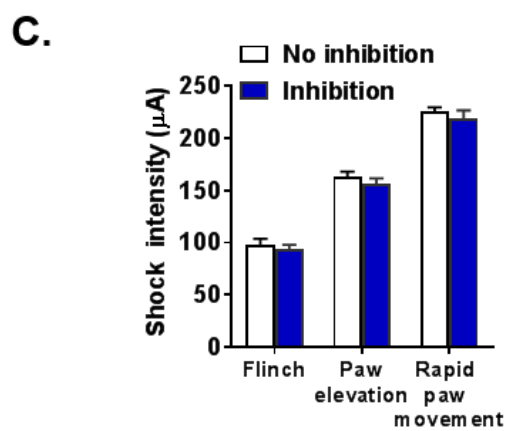

Figure 7

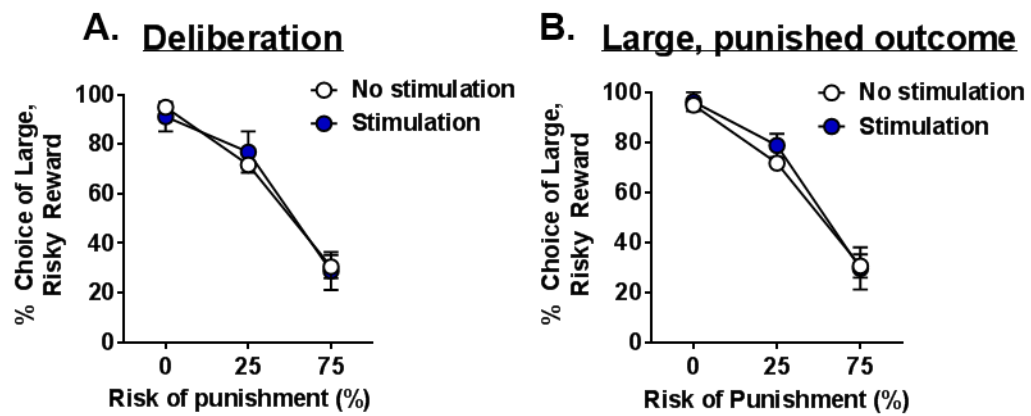

Source: https://www.biorxiv.org/content/10.1101/180885v1.full.pdf
